# Supplementary material for: Association between maternal and paternal mental illness and risk of injuries in children and adolescents: nationwide register based cohort study in Sweden
Source: PubMed Central journal article supplement (PMC7190076; doi:10.1136/bmj.m853), 2020-04-08
Supplement: neva052515.ww.pdf [file neva052515.ww.pdf]

## **Supplementary Files**

### **Maternal and paternal mental illness and risk of injuries in children and adolescents: a nationwide register-based cohort study in Sweden**

Alicia Nevriana (ORCID ID 0000-0003-3434-2757)<sup>1</sup>, Matthias Pierce<sup>2</sup>, Christina Dalman<sup>1,3</sup>, Susanne Wicks<sup>1,3</sup>, Marie Hasselberg<sup>1</sup>, Holly Hope<sup>2</sup>, Kathryn M Abel<sup>2,4</sup>, Kyriaki Kosidou<sup>1,3</sup>

Supplementary Figure 1 Exposure and outcome measurements schematic

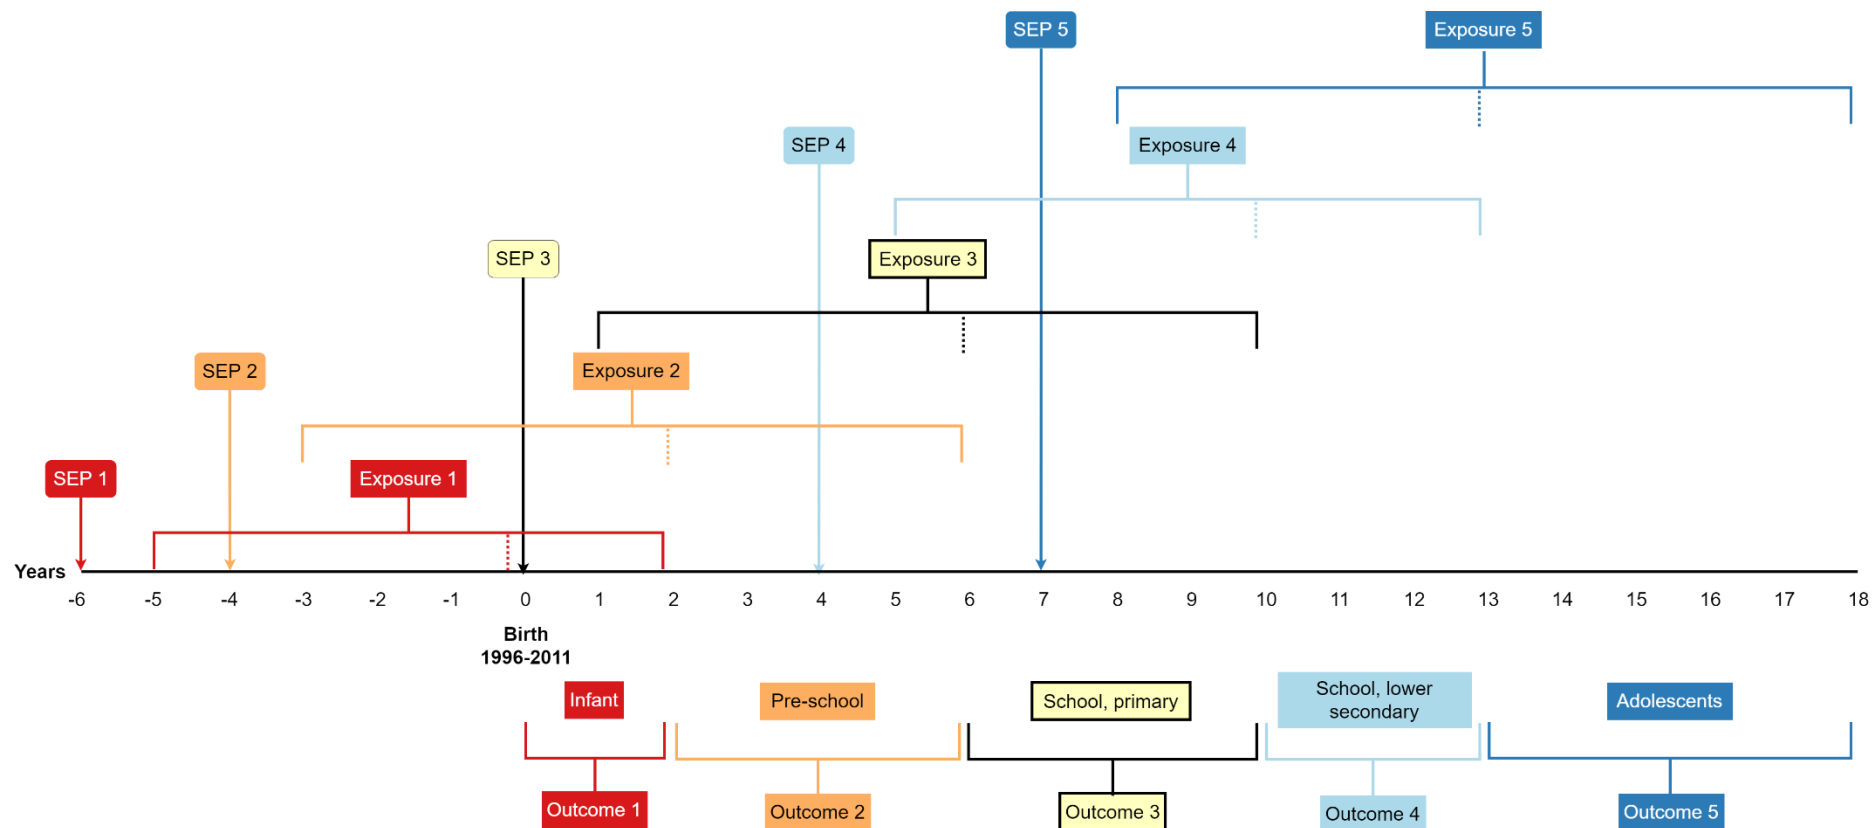

Note:

- Exposure: Parental mental illness
- Outcome: Child injuries
- SEP: Socioeconomic position. Measured at these points: parental education, employment status, family receipt of social welfare benefits, family disposable income in quintiles
- Dotted line: exposure measurement periods for sensitivity analysis

Supplementary Figure 2 Different types of parental mental illness and child's risk of injuries (Adjusted Rate Ratios with 95% CI). Adjusted for sex, birth year, number of siblings (square terms), parental country of birth (missing excluded), maternal age at birth (square terms), paternal age at birth (square terms), living arrangements, parental education, parental employment status, household income.

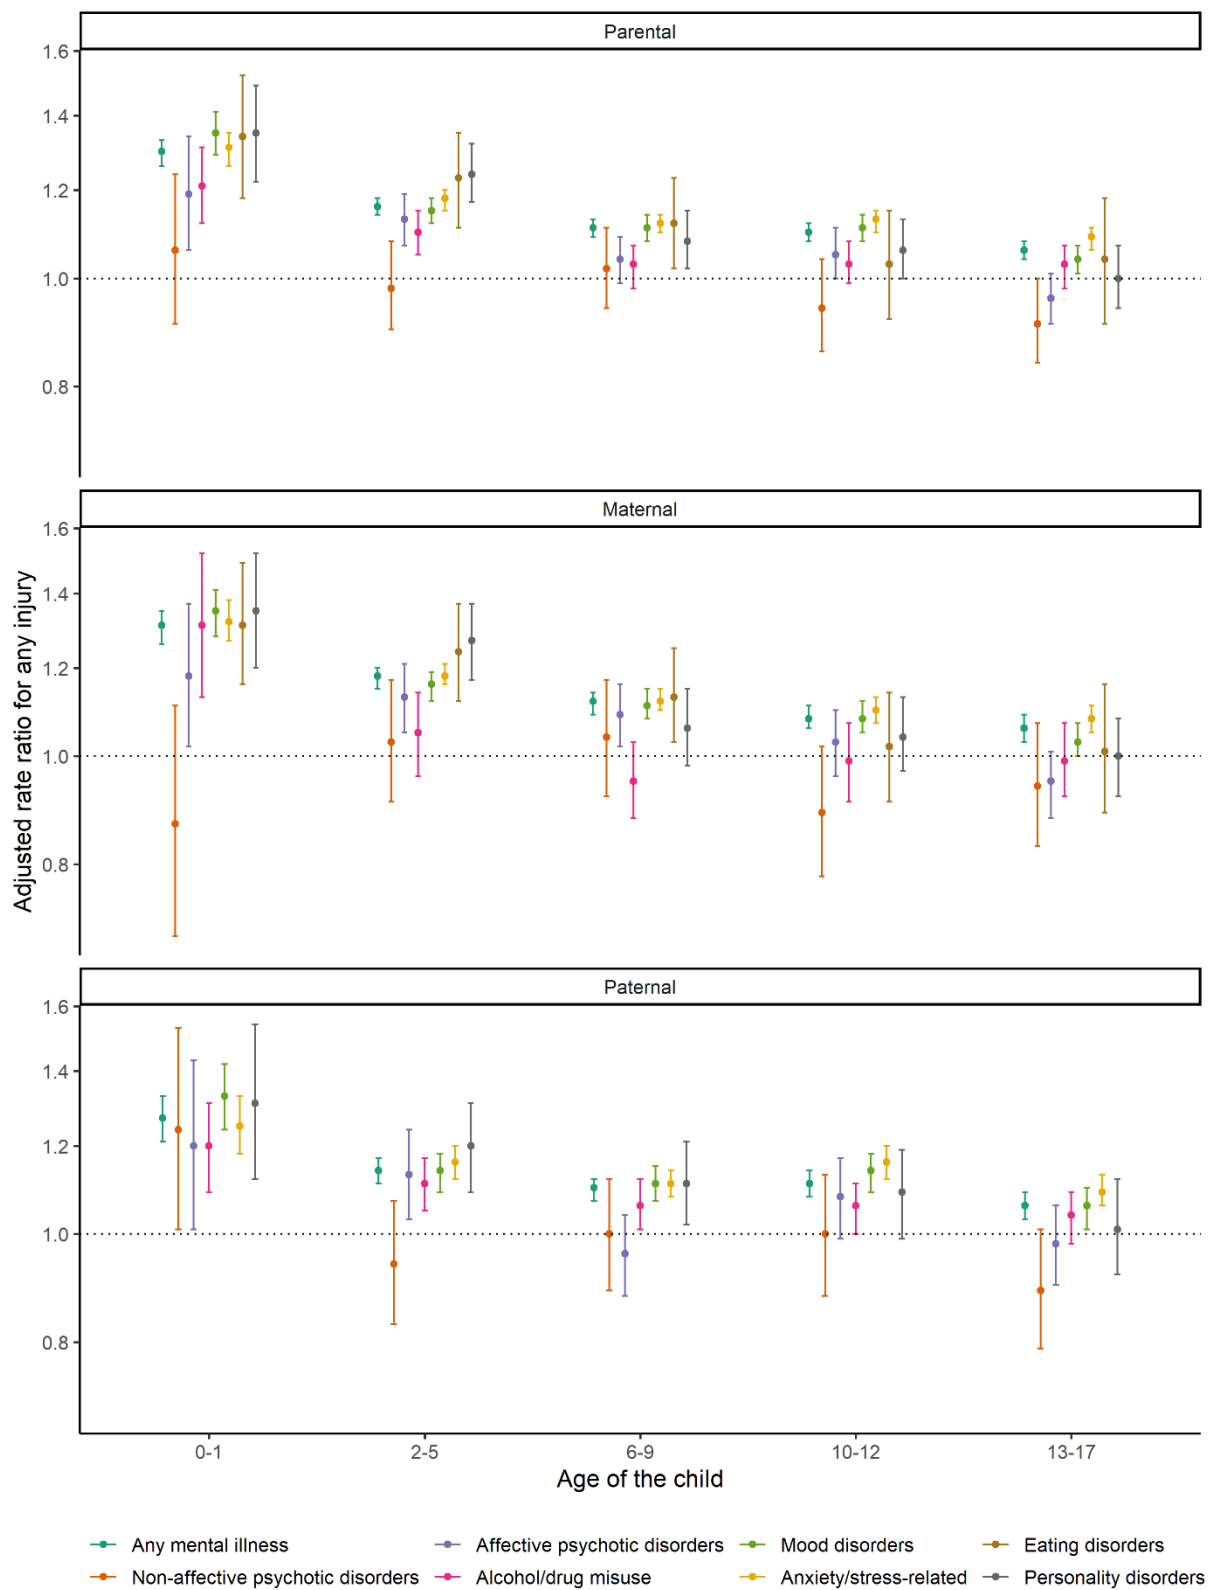

Supplementary Figure 3 Parental mental illness and child's risk of various injuries (Adjusted Rate Ratios with 95% CI). Adjusted for sex, birth year, number of siblings (square terms), parental country of birth (missing excluded), maternal age at birth (square terms), paternal age at birth (square terms), living arrangements, parental education, parental employment status, household income.

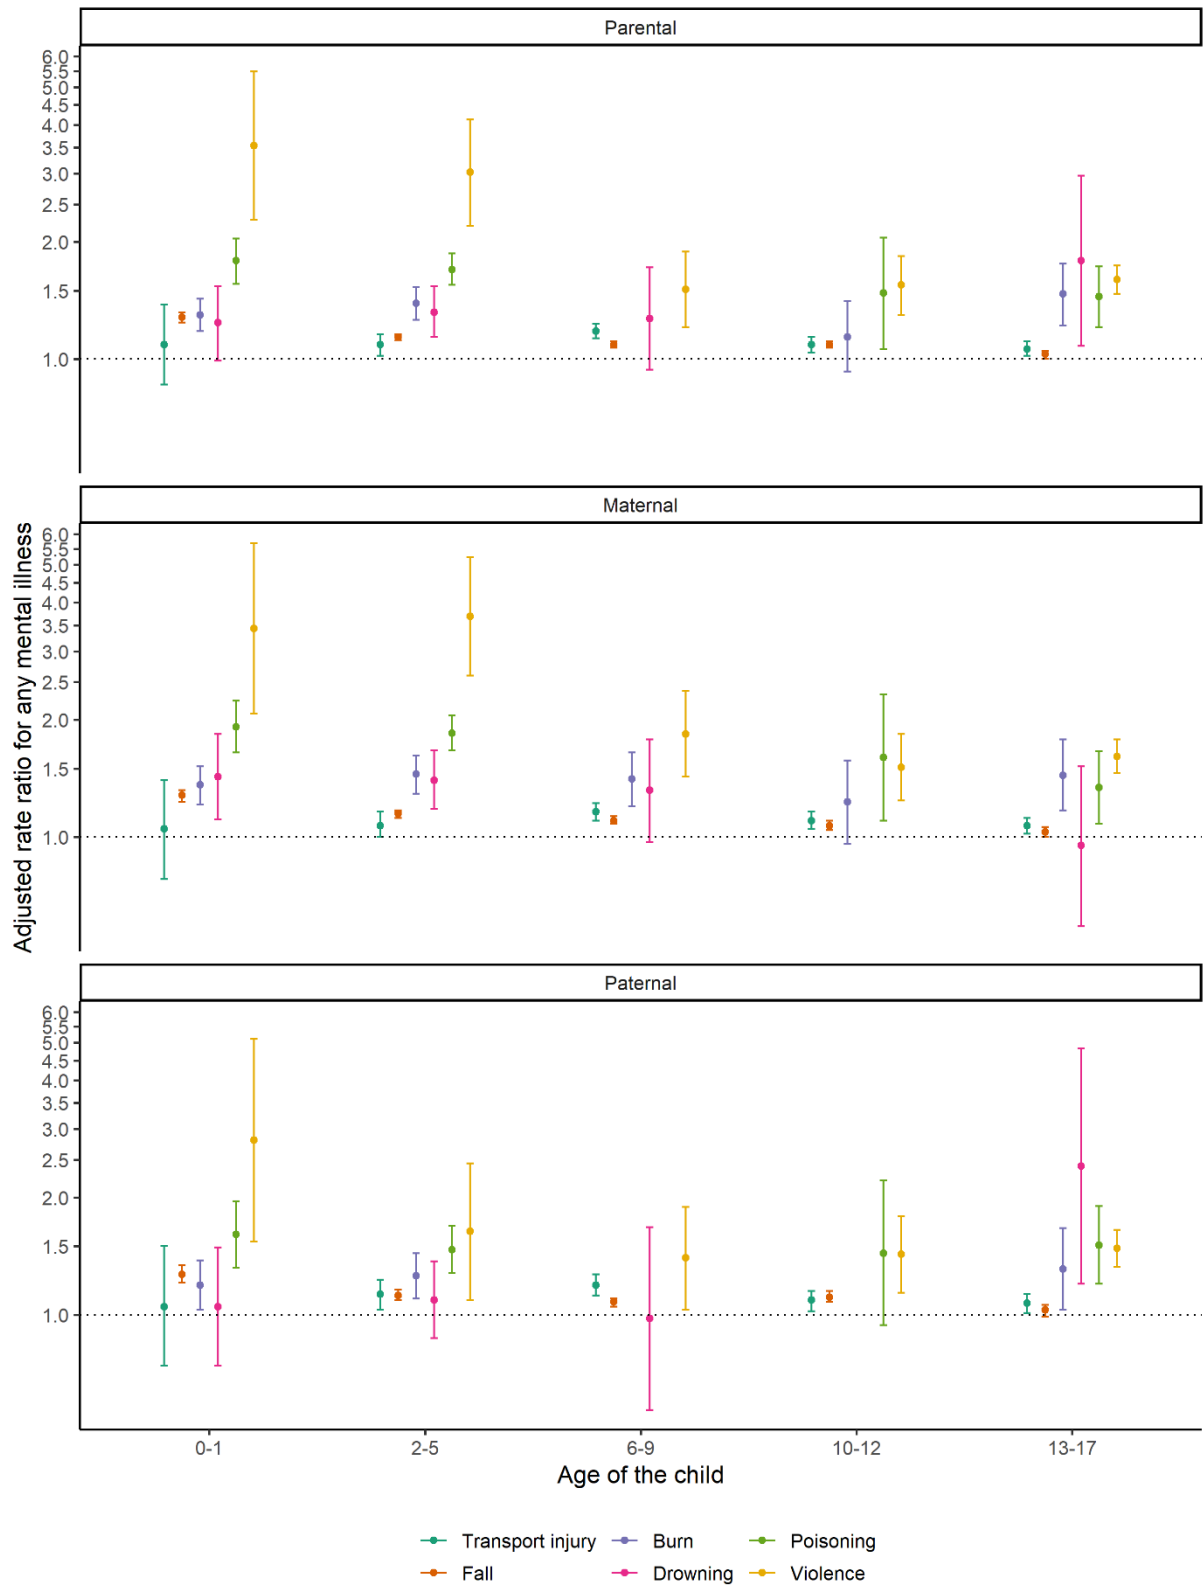

Supplementary Table 1 Distribution of parental socioeconomic position of the children in the study population (N=1,542,000) throughout childhood to adolescence, by the presence of parental mental illness

| Variables                                      | Categories              | Children (N=1,542,000)               |                            |                                      |                            |                                      |                            |                                      |                          |                                      |                          |
|------------------------------------------------|-------------------------|--------------------------------------|----------------------------|--------------------------------------|----------------------------|--------------------------------------|----------------------------|--------------------------------------|--------------------------|--------------------------------------|--------------------------|
|                                                |                         | Period 1: 0-1 years<br>(n=1,351,683) |                            | Period 2: 2-5 years<br>(n=1,458,868) |                            | Period 3: 6-9 years<br>(n=1,371,158) |                            | Period 4: 10-12 years<br>(n=973,174) |                          | Period 5: 13-17 years<br>(n=700,454) |                          |
|                                                |                         | Any parental mental illness          |                            | Any parental mental illness          |                            | Any parental mental illness          |                            | Any parental mental illness          |                          | Any parental mental illness          |                          |
|                                                |                         | CAPRI<br>(N=103,445)                 | Non-CAPRI<br>(N=1,248,238) | CAPRI<br>(N=181,043)                 | Non-CAPRI<br>(N=1,277,825) | CAPRI<br>(N=206,425)                 | Non-CAPRI<br>(N=1,164,733) | CAPRI<br>(N=153,617)                 | Non-CAPRI<br>(N=819,557) | CAPRI<br>(N=124,655)                 | Non-CAPRI<br>(N=575,799) |
|                                                |                         | n (%)                                | n (%)                      | n (%)                                | n (%)                      | n (%)                                | n (%)                      | n (%)                                | n (%)                    | n (%)                                |                          |
| Living arrangement                             | With neither parent     | 756 (0.7)                            | 4,917 (0.4)                | 1,977 (1.1)                          | 2,161 (0.2)                | 3,059 (1.5)                          | 1,966 (0.2)                | 2,840 (1.9)                          | 1,729 (0.2)              | 2,549 (2.0)                          | 1,521 (0.3)              |
|                                                | With one of the parents | 22,409 (21.7)                        | 105,004 (8.4)              | 47,638 (26.3)                        | 124,409 (9.7)              | 75,220 (36.4)                        | 173,456 (14.9)             | 67,008 (43.6)                        | 166,404 (20.3)           | 57,157 (45.9)                        | 134,517 (23.4)           |
|                                                | With both parents       | 80,280 (77.6)                        | 1,138,317 (91.2)           | 131,428 (72.6)                       | 1,151,255 (90.1)           | 128,146 (62.1)                       | 989,311 (84.9)             | 83,769 (54.5)                        | 651,424 (79.5)           | 64,949 (52.1)                        | 439,761 (76.4)           |
| Parental highest education                     | Compulsory              | 18,373 (17.8)                        | 98,318 (7.9)               | 27,204 (15.0)                        | 84,095 (6.6)               | 20,660 (10.0)                        | 49,193 (4.2)               | 12,189 (7.9)                         | 28,836 (3.5)             | 9,104 (7.3)                          | 21,137 (3.7)             |
|                                                | Secondary               | 49,463 (47.8)                        | 591,282 (47.4)             | 86,872 (48.0)                        | 564,636 (44.2)             | 102,986 (49.9)                       | 487,176 (41.8)             | 79,048 (51.5)                        | 346,787 (42.3)           | 63,230 (50.7)                        | 240,116 (41.7)           |
|                                                | University              | 30,672 (29.7)                        | 525,653 (42.1)             | 59,972 (33.1)                        | 588,102 (46.0)             | 77,971 (37.8)                        | 599,435 (51.5)             | 59,157 (38.5)                        | 424,071 (51.7)           | 48,998 (39.3)                        | 296,189 (51.4)           |
| Parental employment status                     | Missing                 | 4,937 (4.8)                          | 32,985 (2.6)               | 6,995 (3.9)                          | 40,992 (3.2)               | 4,808 (2.3)                          | 28,929 (2.5)               | 3,223 (2.1)                          | 19,863 (2.4)             | 3,323 (2.7)                          | 18,357 (3.2)             |
|                                                | Unemployed              | 25,029 (24.2)                        | 154,963 (12.4)             | 40,207 (22.2)                        | 150,820 (11.8)             | 35,060 (17.0)                        | 93,582 (8.0)               | 21,339 (13.9)                        | 46,977 (5.7)             | 16,367 (13.1)                        | 32,588 (5.7)             |
|                                                | Employed                | 69,257 (67.0)                        | 848,580 (68.0)             | 133,096 (73.5)                       | 1,026,785 (80.4)           | 168,237 (81.5)                       | 1,051,252 (90.3)           | 130,122 (84.7)                       | 758,331 (92.5)           | 106,019 (85.1)                       | 529,784 (92.0)           |
| Parental family receipt of social welfare      | Missing                 | 9,159 (8.9)                          | 244,695 (19.6)             | 7,740 (4.3)                          | 100,220 (7.8)              | 3,128 (1.5)                          | 19,899 (1.7)               | 2,156 (1.4)                          | 14,249 (1.7)             | 2,269 (1.8)                          | 13,427 (2.3)             |
|                                                | No                      | 70,186 (67.9)                        | 1,062,519 (85.1)           | 128,688 (71.1)                       | 1,095,353 (85.7)           | 159,770 (77.4)                       | 1,048,122 (90.0)           | 119,797 (78.0)                       | 750,338 (91.6)           | 98,276 (78.8)                        | 526,822 (91.5)           |
|                                                | Yes                     | 29,815 (28.8)                        | 165,107 (13.2)             | 48,389 (26.7)                        | 159,428 (12.5)             | 43,527 (21.1)                        | 96,712 (8.3)               | 31,664 (20.6)                        | 54,970 (6.7)             | 24,110 (19.3)                        | 35,550 (6.2)             |
| Parental family disposable income in quintiles | Missing                 | 3,444 (3.3)                          | 20,612 (1.7)               | 3,966 (2.2)                          | 23,044 (1.8)               | 3,128 (1.5)                          | 19,899 (1.7)               | 2,156 (1.4)                          | 14,249 (1.7)             | 2,269 (1.8)                          | 13,427 (2.3)             |
|                                                | Q1 (lowest)             | 21,967 (21.2)                        | 210,249 (16.8)             | 44,167 (24.4)                        | 239,230 (18.7)             | 33,563 (16.3)                        | 105,110 (9.0)              | 20,974 (13.7)                        | 54,918 (6.7)             | 16,141 (13.0)                        | 39,401 (6.8)             |
|                                                | Q2                      | 28,508 (27.6)                        | 382,239 (30.6)             | 54,321 (30.0)                        | 412,420 (32.3)             | 54,660 (26.5)                        | 212,584 (18.3)             | 39,521 (25.7)                        | 124,768 (15.2)           | 33,128 (26.6)                        | 89,822 (15.6)            |
|                                                | Q3                      | 18,389 (17.8)                        | 221,170 (17.7)             | 33,038 (18.3)                        | 244,767 (19.2)             | 62,698 (30.4)                        | 391,375 (33.6)             | 39,554 (25.8)                        | 214,520 (26.2)           | 29,378 (23.6)                        | 132,268 (23.0)           |
|                                                | Q4                      | 12,911 (12.5)                        | 160,331 (12.8)             | 20,950 (11.6)                        | 164,104 (12.8)             | 32,303 (15.7)                        | 258,905 (22.2)             | 29,972 (19.5)                        | 223,742 (27.3)           | 24,393 (19.6)                        | 155,930 (27.1)           |
|                                                | Q5 (highest)            | 18,228 (17.6)                        | 253,653 (20.3)             | 24,604 (13.6)                        | 194,272 (15.2)             | 20,073 (9.7)                         | 176,860 (15.2)             | 21,440 (14.0)                        | 187,360 (22.9)           | 19,346 (15.5)                        | 144,951 (25.2)           |

---

|         |             |              |             |              |             |              |             |              |             |              |
|---------|-------------|--------------|-------------|--------------|-------------|--------------|-------------|--------------|-------------|--------------|
| Missing | 3,442 (3.3) | 20,596 (1.7) | 3,963 (2.2) | 23,032 (1.8) | 3,128 (1.5) | 19,899 (1.7) | 2,156 (1.4) | 14,249 (1.7) | 2,269 (1.8) | 13,427 (2.3) |
|---------|-------------|--------------|-------------|--------------|-------------|--------------|-------------|--------------|-------------|--------------|

Supplementary Table 2 Distribution of parental mental illness among children in the study population (N=1,542,000) from childhood through adolescence

| Mental illness                    | Children (N=1,542,000) |                     |                     |                       |                       |
|-----------------------------------|------------------------|---------------------|---------------------|-----------------------|-----------------------|
|                                   | Period 1: 0-1 years    | Period 2: 2-5 years | Period 3: 6-9 years | Period 4: 10-12 years | Period 5: 13-17 years |
| Parental                          | N=1,351,683            | N=1,458,868         | N=1,371,158         | N=973,174             | N=700,454             |
|                                   | n (%)                  | n (%)               | n (%)               | n (%)                 | n (%)                 |
| Any mental illness                | 103,445 (7.7)          | 181,043 (12.4)      | 206,425 (15.1)      | 153,617 (15.8)        | 124,655 (17.8)        |
| Non-affective psychotic disorders | 4,584 (0.3)            | 8,125 (0.6)         | 9,122 (0.7)         | 6,925 (0.7)           | 5,743 (0.8)           |
| Affective psychotic disorders     | 6,772 (0.5)            | 15,208 (1.0)        | 20,754 (1.5)        | 16,923 (1.7)          | 14,567 (2.1)          |
| Alcohol/drug misuse               | 16,993 (1.3)           | 27,944 (1.9)        | 33,402 (2.4)        | 26,836 (2.8)          | 23,732 (3.4)          |
| Mood disorders                    | 42,890 (3.2)           | 82,062 (5.6)        | 97,606 (7.1)        | 73,719 (7.6)          | 60,478 (8.6)          |
| Anxiety/stress-related            | 66,220 (4.9)           | 125,192 (8.6)       | 146,630 (10.7)      | 108,104 (11.1)        | 89,428 (12.8)         |
| Eating disorders                  | 4,456 (0.3)            | 5,689 (0.4)         | 5,275 (0.4)         | 3,410 (0.4)           | 2,291 (0.3)           |
| Personality disorders             | 9,448 (0.7)            | 16,267 (1.1)        | 18,665 (1.4)        | 13,853 (1.4)          | 11,006 (1.6)          |
| Maternal                          | N=1,350,054            | N=1,456,895         | N=1,368,854         | N=970,751             | N=697,550             |
|                                   | n (%)                  | n (%)               | n (%)               | n (%)                 | n (%)                 |
| Any mental illness                | 69,980 (5.2)           | 120,059 (8.2)       | 134,523 (9.8)       | 99,703 (10.3)         | 81,305 (11.7)         |
| Non-affective psychotic disorders | 2,515 (0.2)            | 4,118 (0.3)         | 4,451 (0.3)         | 3,486 (0.4)           | 2,908 (0.4)           |
| Affective psychotic disorders     | 4,317 (0.3)            | 9,691 (0.7)         | 13,341 (1.0)        | 10,937 (1.1)          | 9,377 (1.3)           |
| Alcohol/drug misuse               | 5,872 (0.4)            | 8,989 (0.6)         | 10,681 (0.8)        | 9,182 (1.0)           | 8,550 (1.2)           |
| Mood disorders                    | 30,356 (2.3)           | 55,846 (3.8)        | 64,505 (4.7)        | 48,437 (5.0)          | 39,508 (5.7)          |
| Anxiety/stress-related            | 45,806 (3.4)           | 84,693 (5.8)        | 98,061 (7.2)        | 72,404 (7.5)          | 60,587 (8.7)          |
| Eating disorders                  | 4,360 (0.3)            | 5,523 (0.4)         | 5,088 (0.4)         | 3,292 (0.3)           | 2,204 (0.3)           |
| Personality disorders             | 6,265 (0.5)            | 10,310 (0.7)        | 11,734 (0.9)        | 8,781 (0.9)           | 7,000 (1.0)           |
| Paternal                          | N=1,333,264            | N=1,440,026         | N=1,353,299         | N=956,468             | N=682,002             |
|                                   | n (%)                  | n (%)               | n (%)               | n (%)                 | n (%)                 |
| Any mental illness                | 41,975 (3.2)           | 78,343 (5.4)        | 92,130 (6.8)        | 68,435 (7.2)          | 55,720 (8.2)          |
| Non-affective psychotic disorders | 2,128 (0.2)            | 4,097 (0.3)         | 4,755 (0.4)         | 3,500 (0.4)           | 2,884 (0.4)           |
| Affective psychotic disorders     | 2,523 (0.2)            | 5,678 (0.4)         | 7,624 (0.6)         | 6,145 (0.6)           | 5,337 (0.8)           |
| Alcohol/drug misuse               | 12,511 (0.9)           | 20,912 (1.5)        | 24,475 (1.8)        | 18,919 (2.0)          | 16,280 (2.4)          |
| Mood disorders                    | 14,229 (1.1)           | 30,132 (2.1)        | 37,918 (2.8)        | 28,809 (3.0)          | 24,026 (3.5)          |
| Anxiety/stress-related            | 23,816 (1.8)           | 48,892 (3.4)        | 58,596 (4.3)        | 42,781 (4.5)          | 35,050 (5.1)          |
| Eating disorders                  | 96 (0.0)               | 168 (0.0)           | 188 (0.0)           | 118 (0.0)             | 88 (0.0)              |
| Personality disorders             | 3,419 (0.3)            | 6,389 (0.4)         | 7,338 (0.5)         | 5,327 (0.6)           | 4,204 (0.6)           |

Supplementary Table 3 Rate (number of injuries/100,000 person-years) and rate differences of childhood injuries (any type) by age of the child and the type of parental mental illness

| Parental mental illness           | Children (N=1,542,000)            |                  |                              |                                   |                   |                              |                                   |                   |                          |                                   |                   |                            |                                   |                   |                             |
|-----------------------------------|-----------------------------------|------------------|------------------------------|-----------------------------------|-------------------|------------------------------|-----------------------------------|-------------------|--------------------------|-----------------------------------|-------------------|----------------------------|-----------------------------------|-------------------|-----------------------------|
|                                   | Period 1: 0-1 years (N=1,351,683) |                  |                              | Period 2: 2-5 years (N=1,458,868) |                   |                              | Period 3: 6-9 years (N=1,371,158) |                   |                          | Period 4: 10-12 years (N=973,174) |                   |                            | Period 5: 13-17 years (N=700,454) |                   |                             |
|                                   | CAPRI                             | Non-CAPRI        | Rate difference (95% CI)     | CAPRI                             | Non-CAPRI         | Rate difference (95% CI)     | CAPRI                             | Non-CAPRI         | Rate difference (95% CI) | CAPRI                             | Non-CAPRI         | Rate difference (95% CI)   | CAPRI                             | Non-CAPRI         | Rate difference (95% CI)    |
| N injuries (Injury rate)          | N injuries (Injury rate)          |                  | N injuries (Injury rate)     | N injuries (Injury rate)          |                   | N injuries (Injury rate)     | N injuries (Injury rate)          |                   | N injuries (Injury rate) | N injuries (Injury rate)          |                   | N injuries (Injury rate)   | N injuries (Injury rate)          |                   |                             |
| Non-affective psychotic disorders | 329 (3,770.8)                     | 82,629 (3,145.3) | 625.6 (232.0 to 1,048.4)     | 1,035 (3,561.4)                   | 192,500 (3,498.9) | 62.6 (-150.6 to 284.5)       | 1,273 (4,145.8)                   | 186,927 (4,112.3) | 33.5 (-190.9 to 266.2)   | 995 (5,630.3)                     | 147,554 (6,065.0) | -434.6 (-778.7 to -76.2)   | 1,079 (5,285.6)                   | 140,737 (6,081.9) | -796.3 (-1,107.1 to -473.1) |
| Affective psychotic disorders     | 628 (4,759.7)                     | 82,330 (3,139.2) | 1,620.5 (1,257.2 to 2,003.1) | 2,529 (4,411.6)                   | 191,006 (3,489.6) | 922.0 (751.5 to 1,096.8)     | 3,154 (4,620.0)                   | 185,046 (4,104.8) | 515.1 (354.6 to 679.3)   | 2,835 (6,667.6)                   | 145,714 (6,051.1) | 616.5 (372.1 to 866.9)     | 2,949 (5,882.7)                   | 138,867 (6,079.1) | -196.4 (-408.6 to 20.8)     |
| Alcohol/drug misuse               | 1,589 (4,764.3)                   | 81,369 (3,126.6) | 1,637.7 (1,406.2 to 1,876.7) | 4,481 (4,232.4)                   | 189,054 (3,484.9) | 747.5 (623.8 to 873.6)       | 5,234 (4,641.4)                   | 182,966 (4,099.2) | 542.2 (416.2 to 670.5)   | 4,561 (6,635.5)                   | 143,988 (6,045.3) | 590.3 (397.0 to 787.2)     | 5,599 (6,652.9)                   | 136,217 (6,053.3) | 599.6 (423.9 to 778.3)      |
| Mood disorders                    | 4,661 (5,561.9)                   | 78,297 (3,068.0) | 2,493.8 (2,334.2 to 2,656.4) | 13,853 (4,461.2)                  | 179,682 (3,442.0) | 1,019.3 (943.7 to 1,095.6)   | 15,399 (4,696.5)                  | 172,801 (4,067.5) | 629.0 (552.7 to 706.0)   | 12,781 (6,781.2)                  | 135,768 (6,001.9) | 779.3 (658.1 to 901.8)     | 13,629 (6,368.1)                  | 128,187 (6,045.3) | 322.8 (211.4 to 435.2)      |
| Anxiety/stress-related            | 6,946 (5,386.8)                   | 76,012 (3,032.1) | 2,354.7 (2,227.2 to 2,484.2) | 21,334 (4,526.6)                  | 172,201 (3,403.5) | 1,123.1 (1,060.5 to 1,186.2) | 22,894 (4,711.8)                  | 165,306 (4,041.4) | 670.4 (606.6 to 734.7)   | 18,523 (6,785.2)                  | 130,026 (5,971.1) | 814.0 (711.5 to 917.4)     | 20,528 (6,584.0)                  | 121,288 (5,996.4) | 587.6 (491.7 to 684.1)      |
| Eating disorders                  | 507 (5,756.5)                     | 82,451 (3,138.6) | 2,617.9 (2,130.8 to 3,134.1) | 1,054 (4,795.2)                   | 192,481 (3,494.0) | 1,301.2 (1,017.1 to 1,597.0) | 881 (5,006.1)                     | 187,319 (4,109.1) | 897.0 (573.1 to 1,235.4) | 623 (7,212.8)                     | 147,926 (6,057.7) | 1,155.1 (602.5 to 1,737.2) | 557 (7,008.7)                     | 141,259 (6,071.7) | 937.0 (370.0 to 1,536.1)    |
| Personality disorders             | 1,003 (5,398.2)                   | 81,955 (3,131.3) | 2,266.9 (1,939.0 to 2,608.6) | 2,925 (4,738.1)                   | 190,610 (3,485.2) | 1,252.9 (1,082.5 to 1,427.4) | 3,080 (4,904.3)                   | 185,120 (4,101.5) | 802.7 (630.5 to 979.0)   | 2,452 (6,900.2)                   | 146,097 (6,049.5) | 850.8 (579.4 to 1,129.2)   | 2,555 (6,615.8)                   | 139,261 (6,065.8) | 550.0 (294.7 to 811.8)      |

CAPRI: Children and Adolescent with PaRental mental Illness

N injuries: Summary number of injuries

Injury rates: Number of injuries/100,000 person-years

Rate difference: Injury rates in exposed-injury rates in unexposed



Supplementary Table 4 Sensitivity analysis on the association between different types of parental mental illness and child's risk of injuries (any type), exposure period 5 years before outcome period e.g. excluding observations exposed at outcome period (Rate Ratio with 95% CI)

| Parental mental illness           | Children (n=1,542,000) |                     |                     |                     |                     |                     |                       |                     |                       |                     |
|-----------------------------------|------------------------|---------------------|---------------------|---------------------|---------------------|---------------------|-----------------------|---------------------|-----------------------|---------------------|
|                                   | Period 1: 0-1 years    |                     | Period 2: 2-5 years |                     | Period 3: 6-9 years |                     | Period 4: 10-12 years |                     | Period 5: 13-17 years |                     |
|                                   | N=1,351,683            |                     | N=1,458,868         |                     | N=1,371,158         |                     | N=973,174             |                     | N=700,454             |                     |
|                                   | Any injuries           |                     | Any injuries        |                     | Any injuries        |                     | Any injuries          |                     | Any injuries          |                     |
|                                   | Crude                  | Adjusted*           | Crude               | Adjusted*           | Crude               | Adjusted*           | Crude                 | Adjusted*           | Crude                 | Adjusted*           |
| Rate Ratio (95% CI)               | Rate Ratio (95% CI)    | Rate Ratio (95% CI) | Rate Ratio (95% CI) | Rate Ratio (95% CI) | Rate Ratio (95% CI) | Rate Ratio (95% CI) | Rate Ratio (95% CI)   | Rate Ratio (95% CI) | Rate Ratio (95% CI)   | Rate Ratio (95% CI) |
| Any mental illness                | 1.71 (1.67 to 1.76)    | 1.28 (1.24 to 1.33) | 1.35 (1.32 to 1.37) | 1.19 (1.16 to 1.22) | 1.18 (1.16 to 1.20) | 1.12 (1.09 to 1.14) | 1.13 (1.11 to 1.15)   | 1.11 (1.08 to 1.13) | 1.08 (1.06 to 1.10)   | 1.06 (1.03 to 1.08) |
| Non-affective psychotic disorders | 1.15 (1.00 to 1.33)    | 1.04 (0.86 to 1.26) | 1.06 (0.97 to 1.16) | 1.05 (0.94 to 1.19) | 1.04 (0.96 to 1.13) | 1.05 (0.94 to 1.16) | 0.93 (0.85 to 1.02)   | 0.96 (0.86 to 1.07) | 0.85 (0.78 to 0.94)   | 0.88 (0.80 to 0.98) |
| Affective psychotic disorders     | 1.45 (1.31 to 1.61)    | 1.14 (0.98 to 1.33) | 1.27 (1.19 to 1.36) | 1.15 (1.06 to 1.26) | 1.16 (1.10 to 1.23) | 1.07 (0.99 to 1.14) | 1.12 (1.06 to 1.18)   | 1.09 (1.03 to 1.16) | 0.95 (0.90 to 1.01)   | 0.95 (0.89 to 1.01) |
| Alcohol/drug misuse               | 1.52 (1.43 to 1.61)    | 1.20 (1.09 to 1.32) | 1.25 (1.20 to 1.31) | 1.10 (1.03 to 1.18) | 1.17 (1.12 to 1.22) | 1.04 (0.98 to 1.10) | 1.13 (1.08 to 1.18)   | 1.06 (1.01 to 1.13) | 1.12 (1.07 to 1.17)   | 1.03 (0.98 to 1.09) |
| Mood disorders                    | 1.83 (1.76 to 1.90)    | 1.33 (1.27 to 1.41) | 1.35 (1.31 to 1.38) | 1.16 (1.12 to 1.21) | 1.18 (1.16 to 1.21) | 1.12 (1.09 to 1.15) | 1.14 (1.11 to 1.17)   | 1.11 (1.08 to 1.15) | 1.06 (1.03 to 1.09)   | 1.04 (1.01 to 1.08) |
| Anxiety/stress-related            | 1.79 (1.74 to 1.85)    | 1.29 (1.24 to 1.35) | 1.39 (1.36 to 1.42) | 1.20 (1.17 to 1.24) | 1.20 (1.18 to 1.23) | 1.14 (1.11 to 1.17) | 1.16 (1.13 to 1.18)   | 1.15 (1.12 to 1.18) | 1.11 (1.08 to 1.13)   | 1.09 (1.06 to 1.13) |
| Eating disorders                  | 1.77 (1.59 to 1.96)    | 1.29 (1.12 to 1.49) | 1.36 (1.24 to 1.50) | 1.17 (1.03 to 1.32) | 1.15 (1.04 to 1.27) | 1.01 (0.89 to 1.15) | 1.20 (1.08 to 1.34)   | 1.04 (0.91 to 1.19) | 1.16 (1.02 to 1.32)   | 1.02 (0.87 to 1.19) |
| Personality disorders             | 1.65 (1.52 to 1.78)    | 1.22 (1.08 to 1.37) | 1.38 (1.30 to 1.46) | 1.24 (1.13 to 1.36) | 1.23 (1.16 to 1.30) | 1.07 (0.99 to 1.16) | 1.15 (1.08 to 1.21)   | 1.04 (0.97 to 1.13) | 1.10 (1.04 to 1.17)   | 1.04 (0.96 to 1.12) |

  

| Maternal mental illness           | N=1,350,054         |                     | N=1,456,895         |                     | N=1,368,854         |                     | N=970,751           |                     | N=697,550           |                     |
|-----------------------------------|---------------------|---------------------|---------------------|---------------------|---------------------|---------------------|---------------------|---------------------|---------------------|---------------------|
|                                   | Any injuries        |                     | Any injuries        |                     | Any injuries        |                     | Any injuries        |                     | Any injuries        |                     |
|                                   | Crude               | Adjusted*           | Crude               | Adjusted*           | Crude               | Adjusted*           | Crude               | Adjusted*           | Crude               | Adjusted*           |
|                                   | Rate Ratio (95% CI) | Rate Ratio (95% CI) | Rate Ratio (95% CI) | Rate Ratio (95% CI) | Rate Ratio (95% CI) | Rate Ratio (95% CI) | Rate Ratio (95% CI) | Rate Ratio (95% CI) | Rate Ratio (95% CI) | Rate Ratio (95% CI) |
|                                   | Any mental illness  | 1.77 (1.72 to 1.82) | 1.30 (1.25 to 1.35) | 1.36 (1.34 to 1.39) | 1.19 (1.16 to 1.23) | 1.18 (1.16 to 1.21) | 1.11 (1.08 to 1.14) | 1.12 (1.09 to 1.14) | 1.09 (1.06 to 1.12) | 1.09 (1.06 to 1.11) |
| Non-affective psychotic disorders | 1.12 (0.92 to 1.36) | 0.91 (0.68 to 1.23) | 1.06 (0.94 to 1.21) | 1.11 (0.94 to 1.32) | 1.02 (0.91 to 1.15) | 1.05 (0.91 to 1.22) | 0.87 (0.76 to 0.98) | 0.90 (0.77 to 1.06) | 0.84 (0.73 to 0.96) | 0.88 (0.76 to 1.02) |
| Affective psychotic disorders     | 1.58 (1.39 to 1.79) | 1.16 (0.96 to 1.40) | 1.26 (1.15 to 1.37) | 1.16 (1.03 to 1.29) | 1.18 (1.10 to 1.27) | 1.10 (1.01 to 1.21) | 1.09 (1.02 to 1.17) | 1.06 (0.98 to 1.15) | 0.93 (0.86 to 1.00) | 0.93 (0.85 to 1.01) |

|                        |                     |                     |                     |                     |                     |                     |                     |                     |                     |                     |
|------------------------|---------------------|---------------------|---------------------|---------------------|---------------------|---------------------|---------------------|---------------------|---------------------|---------------------|
| Alcohol/drug misuse    | 1.67 (1.51 to 1.84) | 1.29 (1.09 to 1.53) | 1.24 (1.15 to 1.35) | 1.02 (0.89 to 1.17) | 1.09 (1.01 to 1.18) | 0.98 (0.87 to 1.11) | 1.05 (0.97 to 1.14) | 1.02 (0.92 to 1.12) | 1.17 (1.08 to 1.26) | 1.08 (0.98 to 1.18) |
| Mood disorders         | 1.88 (1.80 to 1.96) | 1.36 (1.28 to 1.44) | 1.36 (1.32 to 1.41) | 1.17 (1.12 to 1.22) | 1.19 (1.15 to 1.22) | 1.11 (1.07 to 1.15) | 1.12 (1.09 to 1.16) | 1.09 (1.05 to 1.13) | 1.06 (1.03 to 1.10) | 1.03 (0.99 to 1.07) |
| Anxiety/stress-related | 1.83 (1.77 to 1.90) | 1.32 (1.25 to 1.38) | 1.40 (1.36 to 1.43) | 1.20 (1.16 to 1.25) | 1.20 (1.17 to 1.23) | 1.13 (1.10 to 1.17) | 1.15 (1.12 to 1.18) | 1.12 (1.08 to 1.15) | 1.11 (1.08 to 1.14) | 1.08 (1.04 to 1.12) |
| Eating disorders       | 1.76 (1.58 to 1.95) | 1.27 (1.10 to 1.46) | 1.36 (1.24 to 1.50) | 1.19 (1.04 to 1.35) | 1.15 (1.04 to 1.27) | 1.02 (0.90 to 1.16) | 1.21 (1.09 to 1.35) | 1.05 (0.92 to 1.20) | 1.15 (1.02 to 1.30) | 1.00 (0.86 to 1.16) |
| Personality disorders  | 1.71 (1.56 to 1.89) | 1.24 (1.07 to 1.44) | 1.36 (1.26 to 1.47) | 1.25 (1.11 to 1.40) | 1.23 (1.15 to 1.33) | 1.06 (0.96 to 1.18) | 1.14 (1.06 to 1.23) | 1.03 (0.93 to 1.13) | 1.09 (1.02 to 1.18) | 1.03 (0.93 to 1.13) |

| Paternal mental illness           | N=1,333,264         |                     | N=1,440,026         |                     | N=1,353,299         |                     | N=956,468           |                     | N=682,002           |                     |
|-----------------------------------|---------------------|---------------------|---------------------|---------------------|---------------------|---------------------|---------------------|---------------------|---------------------|---------------------|
|                                   | Any injuries        |                     | Any injuries        |                     | Any injuries        |                     | Any injuries        |                     | Any injuries        |                     |
|                                   | Crude               | Adjusted*           | Crude               | Adjusted*           | Crude               | Adjusted*           | Crude               | Adjusted*           | Crude               | Adjusted*           |
|                                   | Rate Ratio          | Rate Ratio          | Rate Ratio          | Rate Ratio          | Rate Ratio          | Rate Ratio          | Rate Ratio          | Rate Ratio          | Rate Ratio          | Rate Ratio          |
|                                   | (95% CI)            | (95% CI)            | (95% CI)            | (95% CI)            | (95% CI)            | (95% CI)            | (95% CI)            | (95% CI)            | (95% CI)            | (95% CI)            |
| Any mental illness                | 1.58 (1.52 to 1.64) | 1.24 (1.17 to 1.30) | 1.30 (1.26 to 1.34) | 1.17 (1.13 to 1.21) | 1.16 (1.14 to 1.19) | 1.11 (1.08 to 1.14) | 1.13 (1.10 to 1.16) | 1.13 (1.09 to 1.16) | 1.06 (1.03 to 1.09) | 1.07 (1.03 to 1.10) |
| Non-affective psychotic disorders | 1.18 (0.96 to 1.45) | 1.15 (0.89 to 1.49) | 1.05 (0.92 to 1.19) | 1.00 (0.85 to 1.18) | 1.05 (0.94 to 1.19) | 1.04 (0.90 to 1.20) | 0.99 (0.88 to 1.12) | 1.01 (0.88 to 1.17) | 0.87 (0.77 to 0.98) | 0.90 (0.77 to 1.04) |
| Affective psychotic disorders     | 1.26 (1.05 to 1.51) | 1.11 (0.88 to 1.41) | 1.29 (1.17 to 1.44) | 1.15 (1.00 to 1.31) | 1.10 (1.00 to 1.21) | 1.00 (0.89 to 1.12) | 1.15 (1.05 to 1.25) | 1.13 (1.02 to 1.24) | 1.00 (0.91 to 1.10) | 0.99 (0.89 to 1.10) |
| Alcohol/drug misuse               | 1.44 (1.34 to 1.55) | 1.18 (1.06 to 1.32) | 1.26 (1.19 to 1.32) | 1.14 (1.06 to 1.22) | 1.19 (1.14 to 1.25) | 1.06 (0.99 to 1.13) | 1.15 (1.09 to 1.21) | 1.08 (1.01 to 1.16) | 1.08 (1.02 to 1.14) | 1.01 (0.95 to 1.08) |
| Mood disorders                    | 1.71 (1.60 to 1.83) | 1.27 (1.16 to 1.39) | 1.28 (1.22 to 1.34) | 1.15 (1.08 to 1.22) | 1.18 (1.13 to 1.22) | 1.13 (1.08 to 1.19) | 1.16 (1.11 to 1.21) | 1.15 (1.10 to 1.21) | 1.06 (1.01 to 1.11) | 1.08 (1.03 to 1.14) |
| Anxiety/stress-related            | 1.66 (1.58 to 1.75) | 1.22 (1.14 to 1.31) | 1.36 (1.32 to 1.41) | 1.20 (1.14 to 1.25) | 1.19 (1.15 to 1.23) | 1.14 (1.10 to 1.19) | 1.16 (1.12 to 1.20) | 1.19 (1.14 to 1.23) | 1.09 (1.05 to 1.13) | 1.11 (1.07 to 1.16) |
| Personality disorders             | 1.49 (1.29 to 1.71) | 1.16 (0.95 to 1.42) | 1.37 (1.24 to 1.51) | 1.20 (1.05 to 1.39) | 1.24 (1.14 to 1.35) | 1.08 (0.96 to 1.21) | 1.14 (1.05 to 1.25) | 1.07 (0.95 to 1.20) | 1.11 (1.01 to 1.22) | 1.06 (0.94 to 1.20) |

\*Adjusted for sex, birth year, number of siblings (square terms), parental country of birth (missing excluded), maternal age at birth (square terms), paternal age at birth (square terms), living arrangements, parental education, parental employment status, household income.

Analyses for paternal eating disorders were not conducted since there were very few observations.

Supplementary Table 5 Sensitivity analysis on the association between different types of parental mental illness and child's risk of injuries (any type) during age 0-1 years, including only children known to be living with at least one of their birth parents

| Type of mental illness            | Children (n=1,542,000)  |                     |                         |                     |                         |                     |
|-----------------------------------|-------------------------|---------------------|-------------------------|---------------------|-------------------------|---------------------|
|                                   | Parental mental illness |                     | Maternal mental illness |                     | Paternal mental illness |                     |
|                                   | N children=1,346,010    |                     | N children=1,344,406    |                     | N children=1,328,021    |                     |
|                                   | Any injuries            |                     | Any injuries            |                     | Any injuries            |                     |
|                                   | Crude                   | Adjusted*           | Crude                   | Adjusted*           | Crude                   | Adjusted*           |
|                                   | Rate Ratio (95% CI)     | Rate Ratio (95% CI) | Rate Ratio (95% CI)     | Rate Ratio (95% CI) | Rate Ratio (95% CI)     | Rate Ratio (95% CI) |
| Any mental illness                | 1.70 (1.66 to 1.73)     | 1.30 (1.26 to 1.34) | 1.75 (1.70 to 1.79)     | 1.31 (1.26 to 1.35) | 1.61 (1.56 to 1.67)     | 1.27 (1.21 to 1.33) |
| Non-affective psychotic disorders | 1.20 (1.07 to 1.35)     | 1.07 (0.91 to 1.25) | 1.12 (0.96 to 1.32)     | 0.88 (0.69 to 1.12) | 1.29 (1.10 to 1.52)     | 1.25 (1.02 to 1.53) |
| Affective psychotic disorders     | 1.51 (1.39 to 1.64)     | 1.18 (1.05 to 1.32) | 1.59 (1.44 to 1.76)     | 1.16 (1.00 to 1.35) | 1.40 (1.22 to 1.60)     | 1.20 (1.01 to 1.43) |
| Alcohol/drug misuse               | 1.52 (1.44 to 1.61)     | 1.22 (1.12 to 1.32) | 1.71 (1.56 to 1.87)     | 1.32 (1.14 to 1.53) | 1.46 (1.38 to 1.56)     | 1.20 (1.09 to 1.31) |
| Mood disorders                    | 1.81 (1.75 to 1.87)     | 1.35 (1.29 to 1.41) | 1.83 (1.77 to 1.90)     | 1.35 (1.28 to 1.42) | 1.74 (1.65 to 1.84)     | 1.33 (1.23 to 1.42) |
| Anxiety/stress-related            | 1.77 (1.73 to 1.82)     | 1.31 (1.26 to 1.35) | 1.80 (1.75 to 1.86)     | 1.32 (1.27 to 1.38) | 1.70 (1.62 to 1.77)     | 1.25 (1.19 to 1.33) |
| Eating disorders                  | 1.81 (1.65 to 1.99)     | 1.32 (1.16 to 1.49) | 1.80 (1.63 to 1.98)     | 1.29 (1.14 to 1.47) | 2.19 (1.17 to 4.08)     | 2.53 (1.23 to 5.19) |
| Personality disorders             | 1.72 (1.61 to 1.84)     | 1.34 (1.22 to 1.48) | 1.77 (1.63 to 1.92)     | 1.34 (1.19 to 1.51) | 1.60 (1.43 to 1.79)     | 1.32 (1.12 to 1.55) |

\*Adjusted for sex, birth year, number of siblings (square terms), parental country of birth (missing excluded), maternal age at birth (square terms), paternal age at birth (square terms), living arrangements, parental education, parental employment status, household income.

Supplementary Table 6 ICD codes used for identifying childhood psychopathology in the National Patient Register

| Childhood psychopathology diagnoses                                                   | ICD-9 codes       | ICD-10 codes |
|---------------------------------------------------------------------------------------|-------------------|--------------|
| Psychotic disorders                                                                   | 291-298           | F20-29       |
| Alcohol/drug misuse                                                                   | 303-305           | F10-F19      |
| Mood disorders                                                                        | 311               | F30-F39      |
| Anxiety and stress-related disorders                                                  | 300, 306, 308-309 | F40-F48      |
| Behavioural syndromes associated with physiological disturbances and physical factors | 302, 316          | F50-F59      |
| Personality disorders                                                                 | 301, 312          | F60-F69      |
| Pervasive developmental disorders                                                     | 299               | F84          |
| Child- and adolescent-onset behavioural and emotional disorders                       | 307, 313, 314     | F90-95       |
